# Supplementary material
Source: MDPI journal article supplement (doi:10.3390/horticulturae12030339)

## **Supporting Information**

### **Combined Controlled-Release and Common Fertilizer Application Increases Apple Productivity by Optimizing Soil Nutrient and Microbial Communities**

Junyin Li <sup>1</sup>, Shan Li <sup>1</sup>, Denglun Chen <sup>1</sup>, Zekun Wang <sup>1</sup>, Wanting Qi <sup>1</sup>, Pengxiao Ren <sup>1</sup>, Xiaoqian Pei <sup>1</sup>, Shugang Zhang <sup>1, \*</sup>, Yuechao Yang <sup>1, 2, \*</sup>

<sup>1</sup> National Engineering Research Center for Efficient Utilization of Soil and Fertilizer Resources, College of Resources and Environment, Shandong Agricultural University, Tai'an, 271018, Shandong, China

<sup>2</sup> State Key Laboratory of Wheat Improvement, Shandong Agricultural University, Tai'an, 271018, Shandong, China

#### **Corresponding authors:**

Shugang Zhang, shugangzhang2014@163.com

Yuechao Yang, yangyuechao2010@163.com

**Table S1** Listed information was investigated genes and nucleotide sequences of developed primers

| Target gene | Primer  | Sequence (5'-3')        |
|-------------|---------|-------------------------|
| narG        | narG-F  | TACGGYTGGGGYATCGTTTGG   |
|             | NarG-R  | TTCGCSGCRTGCACGTT       |
| nasA        | nasA-F  | CAYTGGACVAAYGTSAARGCNGG |
|             | nasA-R  | GCCATGTCCTTSAGSACCAGRTG |
| nirS2       | nirS2-F | CGCTSTGTTCTCGACAGY      |
|             | nirS2-R | ACRTTGTTSGCSGCRTACAT    |
| nirK1       | nirK1-F | GGMATGGTKCCSTGCRAA      |
|             | nirK1-R | GCRTASAKRTTDGTCGTT      |
| UreC        | UreC-F  | ATGGTGCTYTGYYTGGYGC     |
|             | UreC-R  | CTCATSGTYTCRTCCATRTC    |
| nosZ1       | nosZ1-F | WCSGGYTGSGGRTTSM TSGG   |
|             | nosZ1-R | GCGTCGATTTTGTYAGYTTG    |
| hzsA        | hzsA-F  | ATCCTGGTTGAYTGGGTWTGG   |
|             | hzsA-R  | GCTTTCGTTYTCCTTRTGC     |
| amoA1       | amoA1-F | GGGGTTTCTACTGGTGGT      |
|             | amoA1-R | CCCCTCKGSAAAGCCTTCTTC   |
| amoB        | amoB-F  | AACATCGGCTTCTGGTTYGC    |
|             | amoB-R  | GCRATGTCCTTSAGSACCAG    |
| nxA         | nxA-F   | ATGCGYTGGAAGTGGAAYGC    |
|             | nxA-R   | GCCATGTCCTTSAGSACCAG    |

---

|       |         |                         |
|-------|---------|-------------------------|
| napA  | napA-F  | TAYTTYGAYCCVGAYATHGG    |
|       | napA-R  | GCRTARTGRTRTRTGRTCYTG   |
| nirS1 | nirS1-F | CTTGTCGGCAGYGTSMTGG     |
|       | nirS1-R | AACGTCGTCRTRTCGTTGA     |
| nirS3 | nirS3-F | GTSAACGTSAAGGARACSGG    |
|       | nirS3-R | GASTTCGGRTGSGTCTTGA     |
| nirK2 | nirK2-F | CCGYCAYGGCAAGCTGATCC    |
|       | nirK2-R | GCCTCGATCAGRTTGTAGTT    |
| gdh   | gdh-F   | ATGGCNGCNTTYGAYTTYGG    |
|       | gdh-R   | TCRAANGCRTTYTTYTCYTC    |
| nifH  | nifH-F  | TGCGAYCCSAARGCBGACTC    |
|       | nifH-R  | ATSGCCATCATYTCRCCGGA    |
| niK3  | niK3-F  | GGCTGCTYTGGAACGCG       |
|       | niK3-R  | GGCGTTGAGCTTGTTGA       |
| nosZ2 | nosZ2-F | CGCRACGGCAASAAGGTSMSSGT |
|       | nosZ2-R | CAKRTGCAKSGCRGTCGATT    |
| hzo   | hzo-F   | TTCTGGGAYTTYGGYATGGG    |
|       | hzo-R   | GCCATRTCRTTSAGSACCAG    |
| hzsB  | hzsB-F  | ATCCTGGTTGAYTGGGTWTGG   |
|       | hzsB-R  | GCTTTCGTTYTCCTTRTGC     |
| amoA2 | amoA2-F | GGGTHHTTCGGSTTCGTCCTG   |
|       | amoA2-R | CCCCTCKGSAAAGCCTTCTTC   |

---

---

|      |        |                      |
|------|--------|----------------------|
| hao  | hao-F  | ATGGCCTTYTGGACYGAYGC |
|      | hao-R  | GCRATGTCCTTSAGSACCAG |
| cphy | cphy-F | TGGACCGYTGGTYGAGAAG  |
|      | cphy-R | GCCATRTCRTTSAGSACCAG |
| phnK | phnK-F | ATGGCCTTYTGGACYGAYGC |
|      | phnK-R | GCRATGTCCTTSAGSACCAG |
| ppk3 | ppk3-F | TAYGAYCCVGAYATHGGYT  |
|      | ppk3-R | GCRTARTGRTRTGRTCYTG  |
| phoD | phoD-F | ACIGGIGGIGTIATGTCYCC |
|      | phoD-R | GCSAKIGAKTTIGCRTGYTT |
| bpp  | bpp-F  | ATGGCCTTYTGGACYGAYGC |
|      | bpp-R  | GCRATGTCCTTSAGSACCAG |
| pqqC | pqqC-F | TAYGAYCCVGAYATHGGYT  |
|      | pqqC-R | GCRTARTGRTRTGRTCYTG  |
| ppx  | ppx-F  | ATGGCCTTYTGGACYGAYGC |
|      | ppx-R  | GCRATGTCCTTSAGSACCAG |
| phoX | phoX-F | GAYTTYGAYCCVGAYATHGG |
|      | phoX-R | GCRTARTGRTRTGRTCYTG  |

---

**Figure S1** Release rate of nitrogen, phosphorus, potassium from controlled release fertilizer in laboratory water.

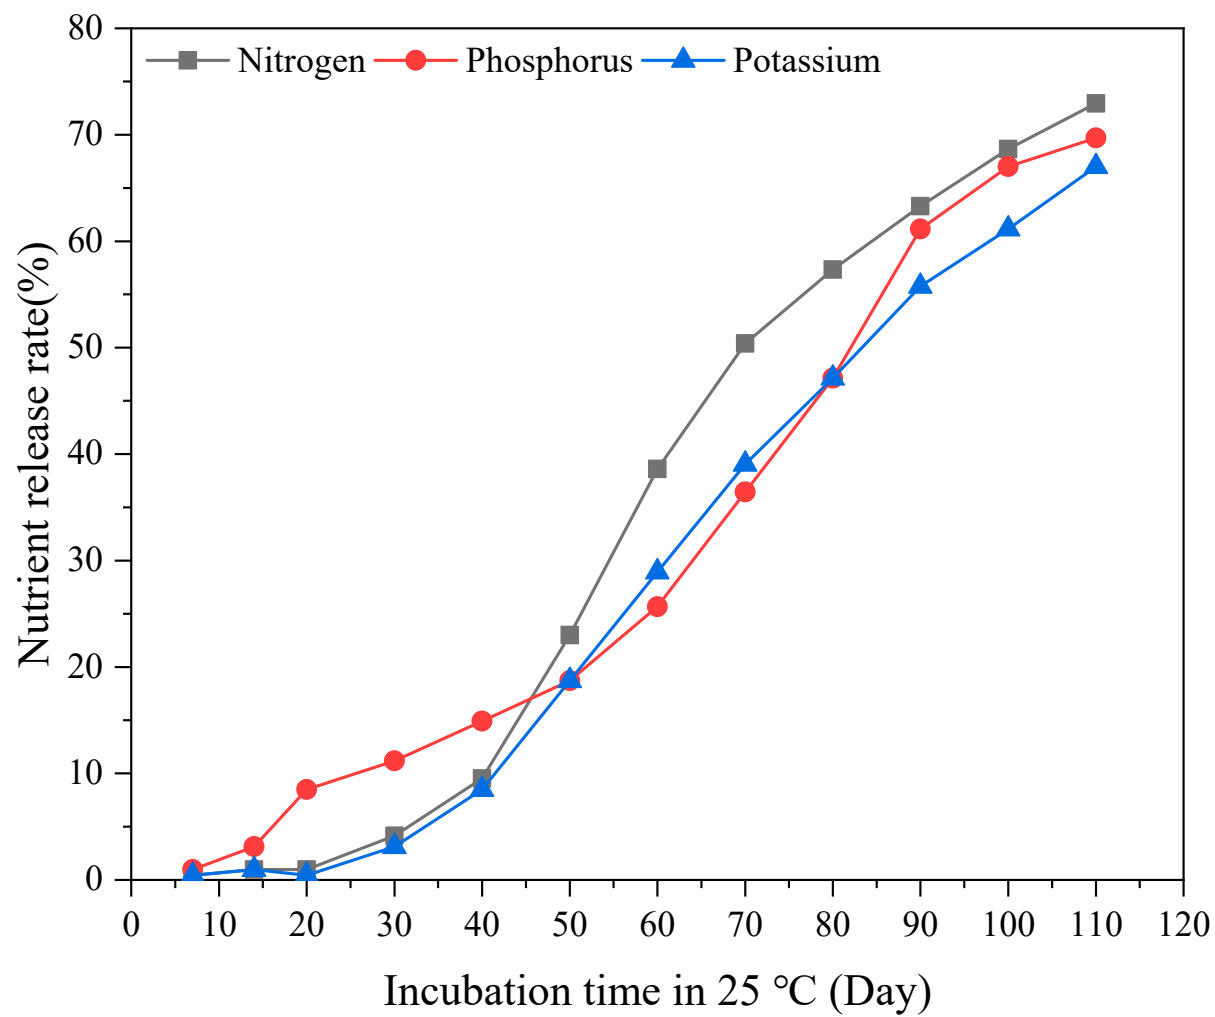

Supplement: s1 [file horticulturae-4168719-supplementary.pdf › horticulturae-4168719-supplementary.pdf]
